# Supplementary material for: Binding mode information improves fragment docking
Source: PubMed Central journal article supplement (PMC6431075; doi:10.1186/s13321-019-0346-7), 2019-03-22
Supplement: 13321_2019_346_MOESM1_ESM.pdf [file 13321_2019_346_MOESM1_ESM.pdf]

## Supplementary Material

# Binding mode information improves fragment docking

*Célien Jacquemard<sup>1</sup>, Malgorzata N. Drwal<sup>1</sup>, Jérémy Desaphy<sup>2</sup>, Esther Kellenberger<sup>1</sup>*

1 Laboratoire d'innovation thérapeutique, UMR7200 CNRS Université de Strasbourg, 67400 Illkirch, France.

2 Lilly Research Laboratories, Eli Lilly and Company, Indianapolis, IN 46285, USA.

### Table of contents

|                                                                                                                              |    |
|------------------------------------------------------------------------------------------------------------------------------|----|
| Figure S1 – Effect of the fragment input conformation on PLANTS performance.....                                             | 2  |
| Figure S2 – IFP, GRIM and ROCS performance in scenario 1 and scenario 3.....                                                 | 3  |
| Figure S3 – Comparing Tanimoto and Tversky similarities for rescoring using IFP and ROCS. ....                               | 4  |
| Figure S4 – Chemical similarity between the docked fragment and the reference molecule picked by GRIM or ROCS Tv-Combo. .... | 5  |
| Figure S5 – ROCS Tv-Combo rescoring performance versus fragment properties. ....                                             | 6  |
| Figure S6 – Tc-IFP rescoring performance versus fragment properties.....                                                     | 7  |
| Table S1 – Description of the proteins in the benchmark set.....                                                             | 8  |
| Table S2 – Kolmogorov-Smirnov test on non-weighted RMSD distributions binned by fragment properties. ....                    | 12 |
| Table S3 – Intersect with the Astex diverse dataset .....                                                                    | 13 |
| Table S4 – Intersect with the D3R datasets.....                                                                              | 14 |
| Table S5 – Intersect with the CSAR datasets.....                                                                             | 15 |
| Table S6 – Fragments with multiple crystallographic poses. ....                                                              | 16 |

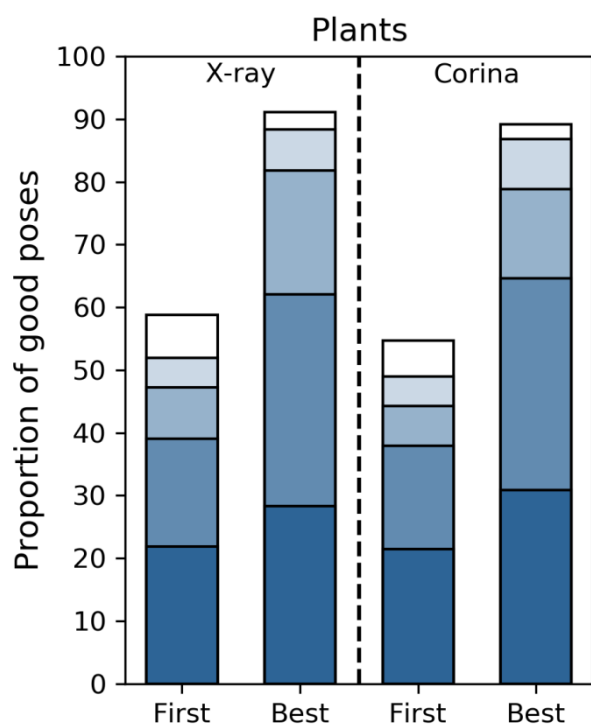

**Figure S1 – Effect of the fragment input conformation on PLANTS performance.**

The proportion of correct poses is based on the RMSD between the native and docked poses of the fragment, considering five threshold values (darker to brighter: 0.5, 1.0, 1.5, 2.0 and 2.5 Å). Proportions are calculated by considering a single pose within the ensemble generated for a complex, as follows: *First* denotes the top scored pose; *Best* denotes the closest to the native pose. The left panel (X-ray) shows results obtained when docking the crystallographic conformation of the fragment. The right part (Corina) shows results obtained when docking the modelled conformation, generated *ab initio* with Corina from the SMILES string.

More details about the modelling of 3D-conformation:

The X-ray structures of the fragments were converted into canonical SMILES using OpenEye Python API 2017, ignoring aromaticity and preserving stereochemistry. The 3D-structures were generated using CORINA v3.40 corina (options: write formal charge, write all hydrogen atoms, preserve stereochemistry, explore alternative conformations of rings).

**A**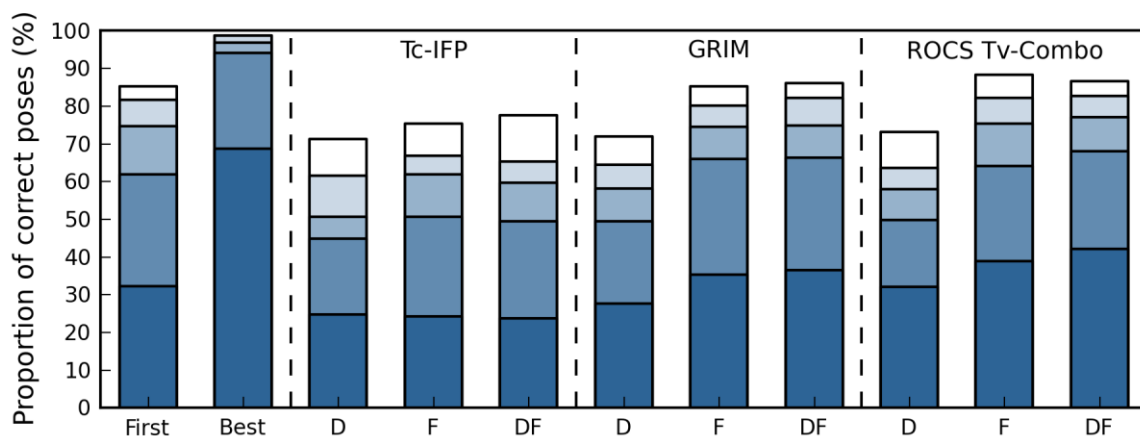**B**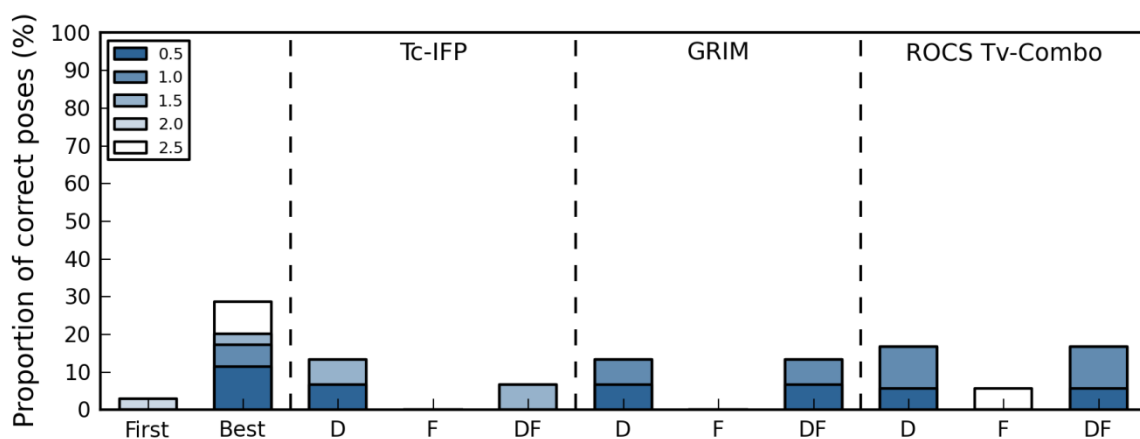

**Figure S2 – IFP, GRIM and ROCS performance in scenario 1 and scenario 3.**

The proportion of correct predictions is based on the RMSD between the predicted and native poses of fragment, considering five threshold values. Proportions are calculated by considering a single pose within the ensemble generated for a complex, as follows: *First* denotes the top scored pose; *Best* denotes the closest to the native pose; *D*, *F* and *DF* denote the poses selected by comparison to, respectively, reference drug-like ligand, reference fragments and both. **(A)** The 24 protein sites without major scoring issues (scenario 1). **(B)** The five protein sites with severe pose generation issues (scenario 2).

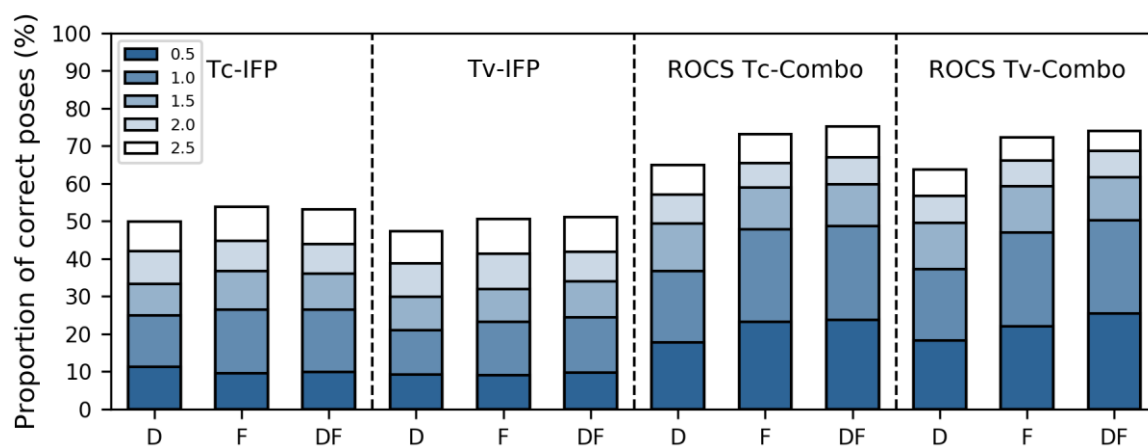

**Figure S3 – Comparing Tanimoto and Tversky similarities for rescoring using IFP and ROCS.**

The proportion of correct poses is based on the RMSD between the native and docked poses of the fragment, considering five threshold values. IFP and ROCS poses were selected by comparison to three sets of reference molecules: drug-like ligands (*D*), fragments (*F*) and both (*DF*).

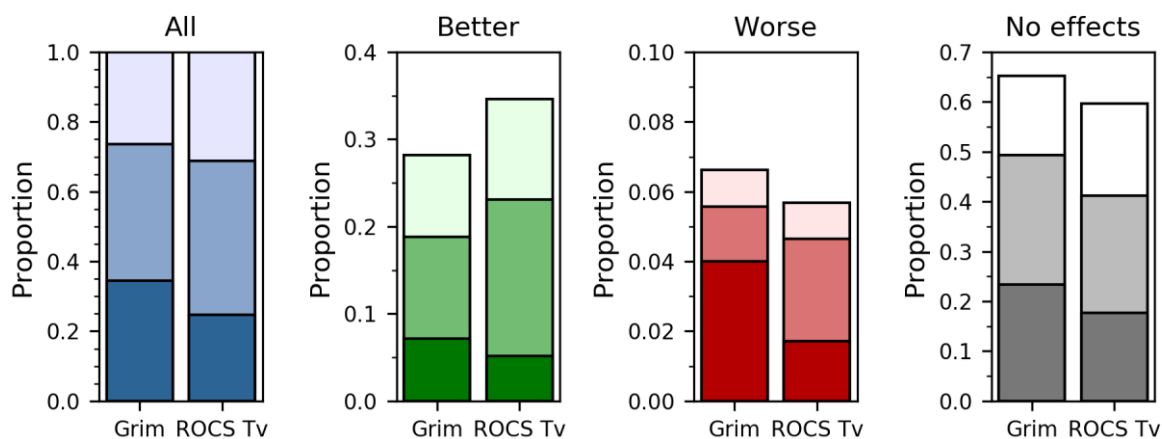

**Figure S4 – Chemical similarity between the docked fragment and the reference molecule picked by GRIM or ROCS Tv-Combo.**

Proportion of pairs with a TvECFP4 similarity  $< 0.3$  (dark),  $\geq 0.3$  and  $< 0.6$  (medium) and  $\geq 0.6$  (light) is given for all the 586 dockings (*All*, in blue), only successful rescoring cases (*Better*, in green), only rescoring failures (*Worse*, in red) or only cases where rescoring has no effects on pose prediction (*No effects*, in grey). Rescoring success corresponds to a decrease of the RMSD to the native pose from  $\geq 2.0$  Å to  $< 2$  Å. Rescoring failure corresponds to an increase of the RMSD to the native pose from  $< 2$  Å to  $\geq 2.0$  Å.

**A**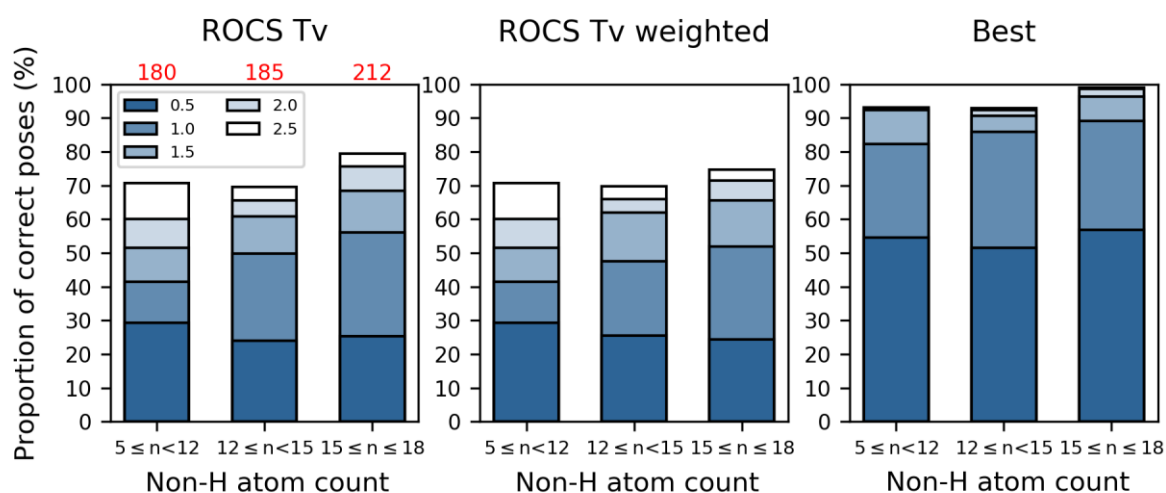**B**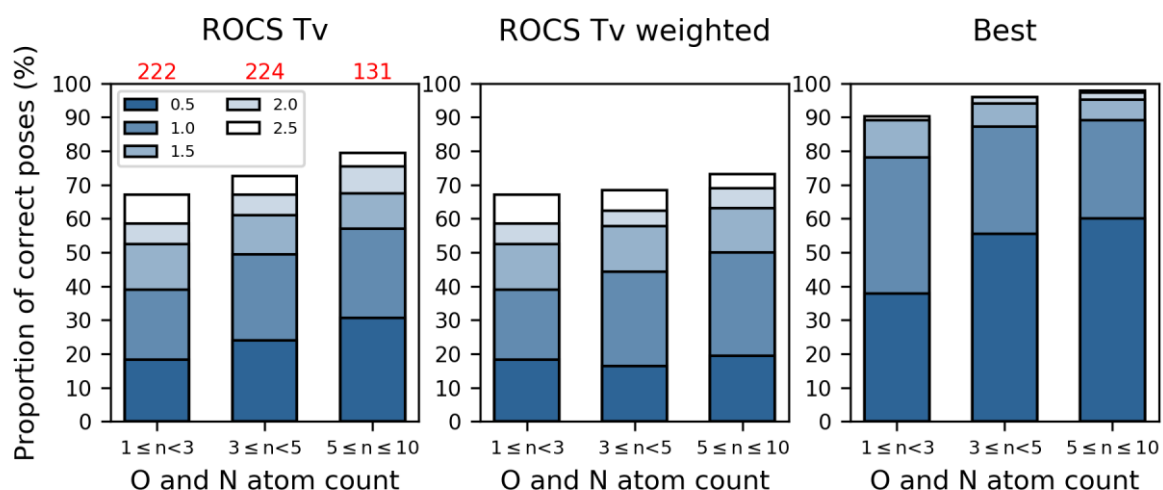**Figure S5 – ROCS Tv-Combo rescoring performance versus fragment properties.**

The reference molecules include both fragments and drug-like molecules (*DF*). Numbers in red indicate the number of fragments in the interval. The scoring performance is evaluated with the RMSD between the native and docked poses (*ROCS Tv*, left). This RMSD is corrected for the increase of the proportion of correct poses in the docking ensemble (*ROCS Tv weighted*, center). This proportion is evaluated with the RMSD between the native pose and the best docking pose (*Best*, right). **(A)** Non-hydrogen atom count. **(B)** Oxygen and nitrogen atom count.

**A**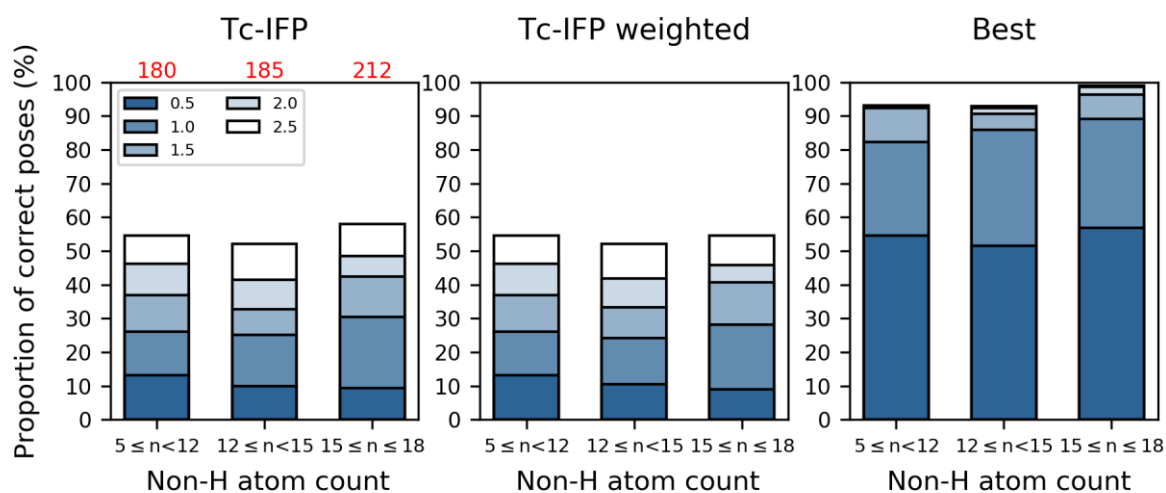**B**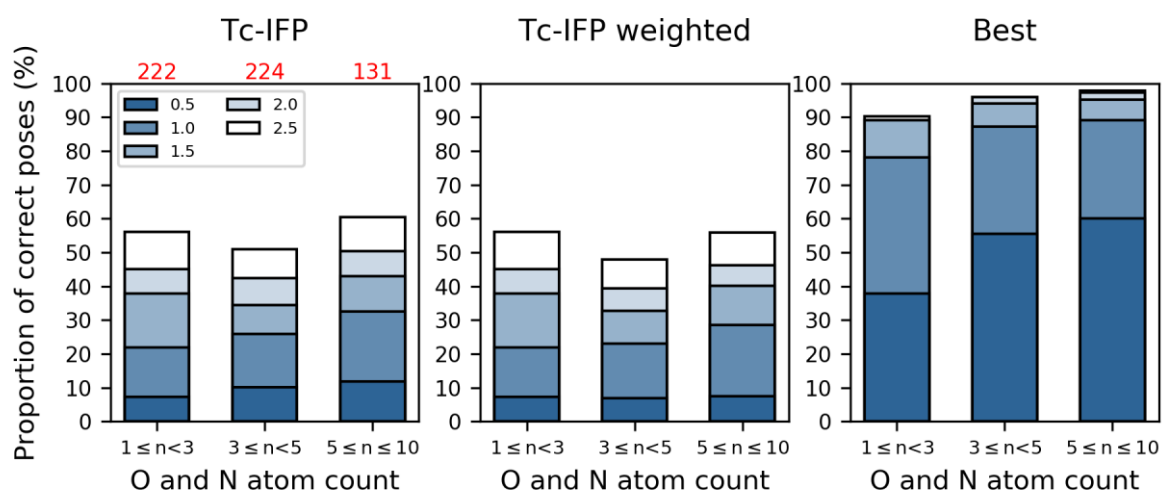**Figure S6 – Tc-IFP rescoring performance versus fragment properties.**

The reference molecules include both fragments and drug-like molecules (*DF*). Numbers in red indicate the number of fragments in the interval. The scoring performance is evaluated with the RMSD between the native and docked poses (*Tc-IFP*, left). This RMSD is corrected for the increase of the proportion of correct poses in the docking ensemble (*Tc-IFP weighted*, center). This proportion is evaluated with the RMSD between the native pose and the best docking pose (*Best*, right). **(A)** Non-hydrogen atom count. **(B)** Oxygen and nitrogen atom count.

**Table S1 – Description of the proteins in the benchmark set**

| Uniprot ID | Uniprot AC | Protein class       | Scoring issue | Number of fragment HET codes | Number of ligand HET codes | Number of fragment structures | Number of ligand structures | C $\alpha$ mean RMSD (Å) | All atom mean RMSD (Å) | Binding site residues | Mean cavity volume (Å <sup>3</sup> ) | Binding site hydrophobicity (%) | Ions in binding site |
|------------|------------|---------------------|---------------|------------------------------|----------------------------|-------------------------------|-----------------------------|--------------------------|------------------------|-----------------------|--------------------------------------|---------------------------------|----------------------|
| ALBU_HUMAN | P02768     | Miscellaneous       | Yes           | 2                            | 12                         | 3                             | 19                          | 2,18                     | 2,39                   | 75                    | 893,6                                | 46,8                            |                      |
| PYGM_RABIT | P00489     | Transferase         | No            | 4                            | 6                          | 4                             | 7                           | 0,28                     | 0,66                   | 55                    | 486,7                                | 25,7                            |                      |
| ALDR_HUMAN | P15121     | Oxidoreductase      | Yes           | 7                            | 16                         | 7                             | 34                          | 0,33                     | 0,56                   | 36                    | 474,6                                | 16,9                            |                      |
| INHA_MYCTU | P9WGR1     | Oxidoreductase      | No            | 3                            | 8                          | 5                             | 12                          | 1,31                     | 1,65                   | 43                    | 645,9                                | 50,4                            |                      |
| AOFB_HUMAN | P27338     | Oxidoreductase      | Yes           | 4                            | 4                          | 16                            | 7                           | 0,28                     | 0,50                   | 41                    | 443,7                                | 31,5                            |                      |
| BRD4_HUMAN | O60885     | Chromatin regulator | Yes           | 13                           | 13                         | 13                            | 22                          | 0,34                     | 0,63                   | 25                    | 388,3                                | 51,8                            |                      |
| ESR2_HUMAN | Q92731     | Activator           | Yes           | 3                            | 3                          | 6                             | 5                           | 0,18                     | 0,61                   | 43                    | 305,2                                | 66,5                            |                      |
| COBT_SALTY | Q05603     | Transferase         | No            | 8                            | 7                          | 14                            | 13                          | 0,13                     | 0,31                   | 42                    | 412,1                                | 47,1                            |                      |
| DNLJ_ENTFA | Q837V6     | Ligase              | No            | 3                            | 2                          | 3                             | 2                           | 0,79                     | 1,27                   | 39                    | 706,7                                | 32,6                            |                      |
| GRIA2_RAT  | P19491     | Ion channel         | No            | 21                           | 2                          | 53                            | 9                           | 1,13                     | 1,27                   | 51                    | 231,1                                | 36,1                            |                      |
| KHK_HUMAN  | P50053     | Transferase         | No            | 3                            | 4                          | 5                             | 4                           | 1,48                     | 1,74                   | 33                    | 420,0                                | 58,1                            |                      |



|              |        |                |     |    |     |    |     |      |      |    |       |      |                |
|--------------|--------|----------------|-----|----|-----|----|-----|------|------|----|-------|------|----------------|
| PIN1_HUMAN   | Q13526 | Isomerase      | No  | 8  | 3   | 9  | 3   | 0,28 | 0,98 | 32 | 274,3 | 30,7 |                |
| Q9HV14_PSEAE | Q9HV14 | Miscellaneous  | No  | 3  | 3   | 3  | 3   | 0,18 | 0,39 | 51 | 454,1 | 39,6 |                |
| Q4Q5S8_LEIMA | Q4Q5S8 | Transferase    | Yes | 4  | 6   | 4  | 6   | 0,58 | 0,82 | 38 | 700,0 | 25,7 |                |
| MAP1_ECOLI   | POAE18 | Hydrolase      | No  | 15 | 4   | 17 | 4   | 0,36 | 0,58 | 29 | 380,9 | 10,0 |                |
| NOSO_BACSU   | O34453 | Oxidoreductase | Yes | 2  | 13  | 2  | 13  | 0,19 | 0,72 | 30 | 877,0 | 25,7 |                |
| HS90A_HUMAN  | P07900 | Chaperone      | Yes | 42 | 64  | 57 | 85  | 1,45 | 1,77 | 48 | 540,8 | 42,8 |                |
| PDE4D_HUMAN  | Q08499 | Hydrolase      | Yes | 3  | 13  | 8  | 48  | 0,27 | 0,49 | 51 | 648,8 | 31,9 | Zn Mg          |
| Q95WL3_TRYCR | Q95WL3 | Transferase    | No  | 5  | 3   | 12 | 3   | 0,28 | 0,66 | 31 | 318,1 | 18,9 | Mg<br>Mg<br>Mg |
| AMP1_PLAFQ   | O96935 | Hydrolase      | No  | 3  | 4   | 3  | 4   | 0,17 | 0,36 | 39 | 551,4 | 33,9 | Zn             |
| PIM1_HUMAN   | P11309 | Transferase    | Yes | 16 | 31  | 16 | 32  | 0,31 | 0,63 | 42 | 510,3 | 53,5 |                |
| ADRB1_MELGA  | P07700 | Receptor       | No  | 3  | 3   | 6  | 8   | 0,23 | 0,39 | 78 | 551,6 | 32,4 |                |
| PK3CG_HUMAN  | P48736 | Transferase    | Yes | 3  | 35  | 3  | 35  | 0,77 | 1,40 | 43 | 627,6 | 46,3 |                |
| PDE10_HUMAN  | Q9Y233 | Hydrolase      | Yes | 22 | 14  | 24 | 25  | 0,28 | 0,46 | 44 | 555,3 | 34,4 | Mg             |
| HPGDS_HUMAN  | O60760 | Isomerase      | Yes | 4  | 8   | 7  | 14  | 0,47 | 0,75 | 38 | 333,5 | 44,8 | Mg             |
| BACE1_HUMAN  | P56817 | Hydrolase      | Yes | 16 | 136 | 19 | 208 | 0,86 | 1,27 | 60 | 739,0 | 26,2 |                |
| DYR1A_HUMAN  | Q13627 | Transferase    | Yes | 7  | 3   | 17 | 13  | 0,42 | 0,71 | 37 | 546,3 | 45,9 |                |
| RORG_HUMAN   | P51449 | Receptor       | Yes | 6  | 4   | 6  | 5   | 0,31 | 0,61 | 53 | 770,4 | 49,2 |                |
| GRIK1_RAT    | P22756 | Ion channel    | No  | 3  | 9   | 17 | 20  | 0,38 | 0,66 | 37 | 363,2 | 27,4 |                |

|              |        |                |     |    |    |    |    |      |      |    |        |      |                |
|--------------|--------|----------------|-----|----|----|----|----|------|------|----|--------|------|----------------|
| ACES_TETCF   | P04058 | Hydrolase      | Yes | 6  | 9  | 15 | 10 | 0,21 | 0,48 | 60 | 658,5  | 19,1 |                |
| THER_BACTH   | P00800 | Hydrolase      | Yes | 11 | 5  | 12 | 5  | 0,38 | 0,63 | 29 | 229,2  | 34,0 | Zn             |
| ESR1_HUMAN   | P03372 | Activator      | No  | 11 | 18 | 18 | 24 | 0,44 | 0,82 | 48 | 416,9  | 63,1 |                |
| PGH1_SHEEP   | P05979 | Oxidoreductase | No  | 4  | 5  | 12 | 7  | 0,21 | 0,45 | 51 | 409,1  | 64,5 |                |
| PYRD_TRYCC   | Q4D3W2 | Oxidoreductase | No  | 10 | 6  | 20 | 11 | 0,42 | 0,59 | 29 | 434,8  | 25,3 |                |
| LKHA4_HUMAN  | P09960 | Hydrolase      | Yes | 11 | 10 | 12 | 14 | 0,15 | 0,29 | 57 | 575,4  | 24,6 | Zn             |
| PA2B8_DABRR  | P59071 | Toxin          | No  | 2  | 1  | 2  | 1  | 0,16 | 0,24 | 46 | 352,2  | 41,9 |                |
| CSK21_HUMAN  | P68400 | Transferase    | No  | 6  | 10 | 7  | 13 | 1,12 | 1,58 | 39 | 499,5  | 49,8 |                |
| PTN1_HUMAN   | P18031 | Hydrolase      | No  | 3  | 4  | 3  | 4  | 0,17 | 0,45 | 40 | 204,6  | 32,8 |                |
| PGH2_MOUSE   | Q05769 | Oxidoreductase | No  | 6  | 7  | 18 | 25 | 0,20 | 0,50 | 46 | 500,5  | 61,0 |                |
| DAPK1_HUMAN  | P53355 | Transferase    | Yes | 3  | 1  | 3  | 1  | 0,52 | 0,80 | 43 | 460,7  | 56,2 |                |
| CHK1_HUMAN   | O14757 | Transferase    | No  | 5  | 24 | 5  | 25 | 0,48 | 0,75 | 46 | 466,8  | 50,4 |                |
| TGT_ZYMMO    | P28720 | Transferase    | No  | 14 | 6  | 19 | 7  | 0,61 | 0,89 | 45 | 397,4  | 37,2 |                |
| FPPS_HUMAN   | P14324 | Transferase    | No  | 7  | 5  | 16 | 9  | 0,19 | 0,57 | 37 | 381,6  | 32,7 | Mg<br>Mg<br>Mg |
| Q9BJJ9_PLAFA | Q9BJJ9 | Miscellaneous  | Yes | 5  | 5  | 11 | 8  | 0,27 | 0,74 | 36 | 613,3  | 45,7 |                |
| PANC_MYCTU   | P9WIL5 | Ligase         | Yes | 5  | 5  | 10 | 6  | 0,25 | 0,63 | 48 | N/A    | N/A  |                |
| CP121_MYCTU  | P9WPP7 | Oxidoreductase | No  | 7  | 6  | 8  | 10 | 0,18 | 0,22 | 45 | 1036,5 | 44,6 |                |
| DOVX11_9SAUR | DOVX11 | Hydrolase      | No  | 4  | 3  | 5  | 4  | 0,46 | 0,78 | 40 | 507,2  | 41,9 |                |

|              |        |                               |     |     |     |     |     |      |      |    |       |      |       |
|--------------|--------|-------------------------------|-----|-----|-----|-----|-----|------|------|----|-------|------|-------|
| MMP12_HUMAN  | P39900 | Hydrolase                     | Yes | 6   | 15  | 6   | 23  | 0,23 | 0,46 | 35 | 398,4 | 36,3 | Zn    |
| HYES_HUMAN   | P34913 | Hydrolase                     | Yes | 21  | 6   | 25  | 8   | 0,61 | 1,01 | 64 | 804,0 | 43,6 |       |
| CDK2_HUMAN   | P24941 | Transferase                   | Yes | 38  | 118 | 44  | 152 | 1,07 | 1,62 | 48 | 539,6 | 45,2 |       |
| TNKS2_HUMAN  | Q9H2K2 | Transferase                   | No  | 26  | 13  | 72  | 26  | 0,96 | 1,62 | 45 | 455,1 | 36,4 |       |
| CAH2_HUMAN   | P00918 | Lyase                         | Yes | 110 | 45  | 122 | 45  | 0,20 | 0,49 | 37 | 326,7 | 27,4 | Zn    |
| CPXA_PSEPU   | P00183 | Oxidoreductase                | Yes | 3   | 3   | 68  | 3   | 0,84 | 1,12 | 40 | 321,4 | 58,0 |       |
| PDPK1_HUMAN  | O15530 | Transferase                   | Yes | 6   | 21  | 6   | 25  | 0,41 | 0,94 | 49 | 513,9 | 47,7 | Mg    |
| BLA1_STEMA   | P52700 | Hydrolase                     | Yes | 6   | 4   | 7   | 6   | 0,23 | 0,92 | 27 | 225,3 | 39,4 | Zn Zn |
| AMPN_ECOLI   | P04825 | Hydrolase                     | No  | 5   | 3   | 5   | 4   | 0,21 | 0,73 | 37 | 545,8 | 23,0 | Zn    |
| JAK2_HUMAN   | O60674 | Transferase                   | Yes | 5   | 14  | 6   | 25  | 0,82 | 1,13 | 44 | 595,5 | 47,7 |       |
| AMPC_ECOLI   | P00811 | Hydrolase                     | Yes | 16  | 3   | 30  | 3   | 0,83 | 1,15 | 36 | 410,0 | 27,8 |       |
| PNMT_HUMAN   | P11086 | Transferase                   | Yes | 29  | 3   | 57  | 5   | 0,24 | 0,40 | 42 | 185,4 | 27,4 |       |
| Q9WYE2_THEMA | Q9WYE2 | Miscellaneous                 | No  | 4   | 4   | 8   | 7   | 0,47 | 0,68 | 36 | 427,5 | 34,8 |       |
| ACCC_ECOLI   | P24182 | Ligase                        | Yes | 6   | 5   | 11  | 9   | 0,93 | 1,11 | 44 | 493,9 | 39,2 |       |
| GSK3B_HUMAN  | P49841 | Signal transduction inhibitor | Yes | 2   | 16  | 4   | 28  | 0,80 | 1,07 | 39 | 538,5 | 45,6 |       |
| NOS2_MOUSE   | P29477 | Oxidoreductase                | Yes | 7   | 7   | 12  | 14  | 0,26 | 0,50 | 37 | 564,7 | 22,5 |       |
| BGLA_THEMA   | Q08638 | Hydrolase                     | No  | 11  | 5   | 22  | 15  | 0,17 | 0,44 | 34 | 481,8 | 16,3 |       |

**Table S2 – Kolmogorov-Smirnov test on non-weighted RMSD distributions binned by fragment properties.**

Goodness of fit is evaluated using  $D$  followed by two-tailed  $p$ -value. Failed tests are indicated in red ( $\alpha = 0.05$ ). **(A)** GRIM. **(B)** ROCS Tv-Combo. **(C)** Tc-IFP. Distributions are not normal (see Figures 9, S5 and S6).

**A**

| GRIM                      |   | Non-hydrogen atom count |               |               |
|---------------------------|---|-------------------------|---------------|---------------|
|                           |   | Interval                | 1             | 2             |
| Oxygen and nitrogen count | 1 |                         | 0.06685, 0.89 | 0.1123, 0.20  |
|                           | 2 | 0.1770, 0.034           |               | 0.09382, 0.30 |
|                           | 3 | 0.2374, 0.0018          | 0.08121, 0.38 |               |

**B**

| ROCS Tv-Combo             |   | Non-hydrogen atom count |               |                |
|---------------------------|---|-------------------------|---------------|----------------|
|                           |   | Interval                | 1             | 2              |
| Oxygen and nitrogen count | 1 |                         | 0.1097, 0.32  | 0.1974, 0.0017 |
|                           | 2 | 0.1286, 0.23            |               | 0.1056, 0.18   |
|                           | 3 | 0.1962, 0.016           | 0.1176, 0.062 |                |

**C**

| Tc-IFP                    |   | Non-hydrogen atom count |                |              |
|---------------------------|---|-------------------------|----------------|--------------|
|                           |   | Interval                | 1              | 2            |
| Oxygen and nitrogen count | 1 |                         | 0.1216, 0.21   | 0.1093, 0.23 |
|                           | 2 | 0.08920, 0.68           |                | 0.1037, 0.19 |
|                           | 3 | 0.1055, 0.49            | 0.1008, 0.1546 |              |

**Table S3 – Intersect with the Astex diverse dataset**

| <b>Protein (UniProt ID/AC)</b> | <b>PDB ID</b> | <b>HET ID</b> | <b>Class</b>     |
|--------------------------------|---------------|---------------|------------------|
| PNMT_HUMAN/P11086              | 1HNN          | SKF           | Fragment         |
| AMPC_ECOLI/P00811              | 1L2S          | STC           | Drug-like ligand |
| PANC_MYCTU/P9WIL5              | 1N2J          | PAF           | Fragment         |
| TGT_ZYMMO/P28720               | 1N2V          | BDI           | Fragment         |
| CPXA_PSEPU/P00183              | 1P2Y          | NCT           | Fragment         |
| PGH1_SHEEP/P05979              | 1Q4G          | BFL           | Fragment         |
| ESR1_HUMAN/P03372              | 1SJ0          | E4D           | Drug-like ligand |
| ALDR_HUMAN/P15121              | 1T40          | ID5           | Drug-like ligand |
| PDE4D_HUMAN/Q08499             | 1XOQ          | ROF           | Drug-like ligand |
| CHK1_HUMAN/O14757              | 2BR1          | PFP           | Drug-like ligand |
| HS90A_HUMAN/P07900             | 2BSM          | BSM           | Drug-like ligand |

**Table S4 – Intersect with the D3R datasets**

| <b>Protein (UniProt ID/AC)</b> | <b>PDB ID</b> | <b>HET ID</b> | <b>Class</b>     |
|--------------------------------|---------------|---------------|------------------|
| HS90A_HUMAN/P07900             | 3OW6          | MEX           | Fragment         |
| HS90A_HUMAN/P07900             | 3OWD          | MEY           | Drug-like ligand |
| HS90A_HUMAN/P07900             | 4YKU          | 4ER           | Fragment         |
| HS90A_HUMAN/P07900             | 4YKW          | 4ES           | Fragment         |
| HS90A_HUMAN/P07900             | 4YKX          | 4ET           | Fragment         |
| HS90A_HUMAN/P07900             | 4YKY          | 4EU           | Fragment         |
| HS90A_HUMAN/P07900             | 4YKZ          | 4EV           | Fragment         |

**Table S5 – Intersect with the CSAR datasets**

| <b>Protein (UniProt ID/AC)</b> | <b>PDB ID</b> | <b>HET ID</b> | <b>Class</b>     |
|--------------------------------|---------------|---------------|------------------|
| ALBU_HUMAN/P02768              | 1HA2          | SWF           | Drug-like ligand |
| AMPC_ECOLI/P00811              | 2HDQ          | C21           | Fragment         |
| AMPC_ECOLI/P00811              | 2HDR          | 4A3           | Fragment         |
| BACE1_HUMAN/P56817             | 2VKM          | BSD           | Drug-like ligand |
| BGLA_THEMA/Q08638              | 2J78          | GOX           | Fragment         |
| BLA1_STEMA/P52700              | 2QDT          | I38           | Fragment         |
| CAH2_HUMAN/P00918              | 2H15          | B19           | Drug-like ligand |
| CDK2_HUMAN/P24941              | 1PXP          | CK8           | Drug-like ligand |
| CDK2_HUMAN/P24941              | 2C5O          | CK2           | Fragment         |
| CDK2_HUMAN/P24941              | 2FVD          | LIA           | Drug-like ligand |
| CHK1_HUMAN/O14757              | 4FT3          | H1K           | Drug-like ligand |
| CHK1_HUMAN/O14757              | 4FTU          | 7HK           | Drug-like ligand |
| CHK1_HUMAN/O14757              | 4GH2          | HK0           | Drug-like ligand |
| ESR2_HUMAN/Q92731              | 2JJ3          | JJ3           | Drug-like ligand |
| ESR2_HUMAN/Q92731              | 2Z4B          | DC8           | Drug-like ligand |
| GRIA2_RAT/P19491               | 1SYH          | CPW           | Fragment         |
| HS90A_HUMAN/P07900             | 1YC1          | 4BC           | Drug-like ligand |
| HS90A_HUMAN/P07900             | 3EKO          | PYU           | Fragment         |
| MAP1_ECOLI/P0AE18              | 2P98          | YE7           | Fragment         |
| PIM1_HUMAN/P11309              | 3BGZ          | VX3           | Drug-like ligand |
| PNMT_HUMAN/P11086              | 1HNN          | SKF           | Fragment         |
| PTN1_HUMAN/P18031              | 2AZR          | 982           | Fragment         |
| PTN1_HUMAN/P18031              | 2B07          | 598           | Drug-like ligand |
| PTN1_HUMAN/P18031              | 2QBR          | 910           | Drug-like ligand |
| PTN1_HUMAN/P18031              | 2QBS          | 024           | Drug-like ligand |
| TGT_ZYMMO/P28720               | 1ENU          | APZ           | Fragment         |
| TGT_ZYMMO/P28720               | 1S38          | MAQ           | Fragment         |

**Table S6 – Fragments with multiple crystallographic poses.**

| Uniprot ID   | HET code | Number of        |                 |                          | Remark (c)       |
|--------------|----------|------------------|-----------------|--------------------------|------------------|
|              |          | X-ray structures | X-ray poses (a) | Correct docked poses (b) |                  |
| TNKS2_HUMAN  | 33E      | 6                | 3               | 1                        | Missing cofactor |
| Q95WL3_TRYCR | IPE      | 2                | 2               | 0                        | Missing cofactor |
| AMPC_ECOLI   | F12      | 2                | 2               | 1                        | Missing cofactor |
| CPXA_PSEPU   | CAM      | 2                | 2               | 0                        | Missing cofactor |
| CDK2_HUMAN   | CK2      | 2                | 2               | 2                        |                  |
| PDE4D_HUMAN  | IBM      | 2                | 2               | 0                        | Missing cofactor |

(a) The number of crystallographic (X-ray) poses was evaluated as the number of clusters obtained using a RMSD threshold of 1.0 Å (see methods for more details).

(b) The RMSD of the coordinates of the crystallographic and docked poses is lower than 1.0 Å.

(c) Difficulties encountered during pose placement.
